# Supplementary material for: A new organic–inorganic hybrid based on the crescent-shaped polyoxoanion [H6SiNb18O54]8− and copper–organic cations
Source: Royal Society of Chemistry journal article supplement (doi:10.1039/c2dt30265a), 2012-01-01
Supplement: c2dt30265a.pdf [file c2dt30265a.pdf]

## Supplementary Information

### **A New Organic-Inorganic Hybrid Based on the Crescent-Shaped Polyoxoanion $[\text{H}_6\text{SiNb}_{18}\text{O}_{54}]^{8-}$ and Copper-Organic Cations**

Peng Huang, Chao Qin, Xin-Long Wang,\* Chun-Yi Sun, Yan Xing\* Hai-Ning Wang, Kui-Zhan Shao and Zhong-Min Su\*

Institute of Functional Material Chemistry, Key Lab of Polyoxometalate, Science of Ministry of Education, Faculty of Chemistry, Northeast Normal University, Changchun, 130024 Jilin, People's Republic of China. *Fax:* +86-431-85684009; *Tel:* +86-431-85099108. *E-mail:* [zmsu@nenu.edu.cn](mailto:zmsu@nenu.edu.cn)

## 1. Materials and Methods

All the chemicals were obtained from commercial sources, and were used without further purification. Elemental analyses (C, H, N) were measured on a Perkin-Elmer 2400 CHN elemental analyzer; Nb, Si and Cu were determined with a Plasma-SPEC(I) ICP atomic emission spectrometer. IR spectrum was performed in the range 4000–400  $\text{cm}^{-1}$  using KBr pellets on an Alpha Centaur FT/IR spectrophotometer. Powder X-ray diffraction measurement was recorded radiation ranging from 5 to 50° at room temperature on a Siemens D5005 diffractometer with Cu-K $\alpha$  ( $\lambda = 1.5418 \text{ \AA}$ ). Thermogravimetric analysis (TGA) of the samples was performed using a Perkin-Elmer TG-7 analyzer heated from room temperature to 900 °C under nitrogen at the heating rate of 5 °C·min<sup>-1</sup>.

## 2. Synthesis

Syntheses of **1**:  $\text{K}_7\text{HNb}_6\text{O}_{19}\cdot 13\text{H}_2\text{O}$  was prepared according to the literature method and identified by IR spectra.<sup>1</sup> Ethylenediamine (0.003 g, 0.050 mmol) was added to the solution of  $\text{Cu}(\text{Ac})_2\cdot 3\text{H}_2\text{O}$  (0.024 g, 0.100 mmol) in water (5 mL) under stirring. Then the resulting blue solution was added dropwise to the solution of  $\text{K}_7\text{HNb}_6\text{O}_{19}\cdot 13\text{H}_2\text{O}$  (0.137 g, 0.100 mmol) and  $\text{Na}_2\text{SiO}_3\cdot 9\text{H}_2\text{O}$  (0.057 g, 0.200 mmol) in water (10 mL) under stirring. Subsequently, the mixture was adjusted to pH 11 using NaOH (1 molL<sup>-1</sup>) solution and was transferred into a 23 mL Teflon-lined stainless steel container and heated at 160 °C for 72 hours. After cooling to room temperature, the block-shaped purple crystals of **1** were collected by filtration. Yield: 39 mg (32.1% based on Nb). Elemental analysis: Anal. Calc.: C 5.24%; H 2.25%; N 6.11%. Found: C 5.40%; H 2.44%; N 6.33%.

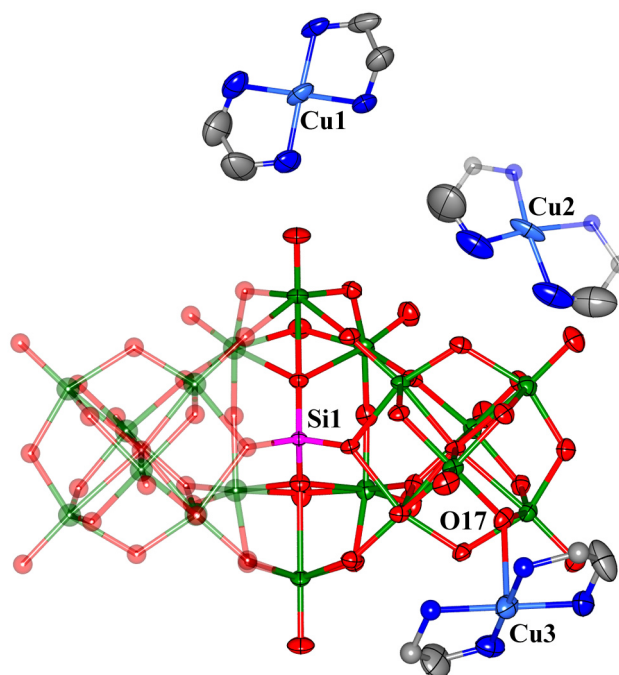

**Fig. S1.** ORTEP diagram showing the asymmetric unit of compound 1 with thermal ellipsoids at 50% probability.

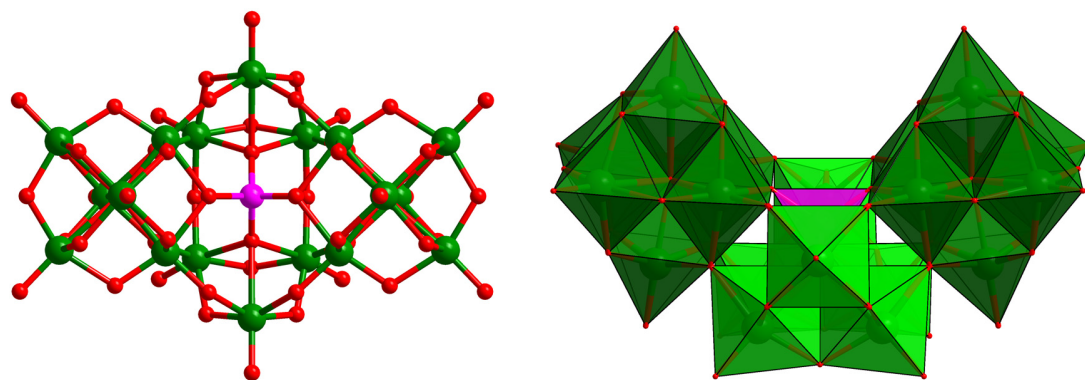

**Fig. S2.** Ball-and-stick and polyhedral representations of the polyoxoanion  $[H_6SiNb_{18}O_{54}]^{8-}$ .

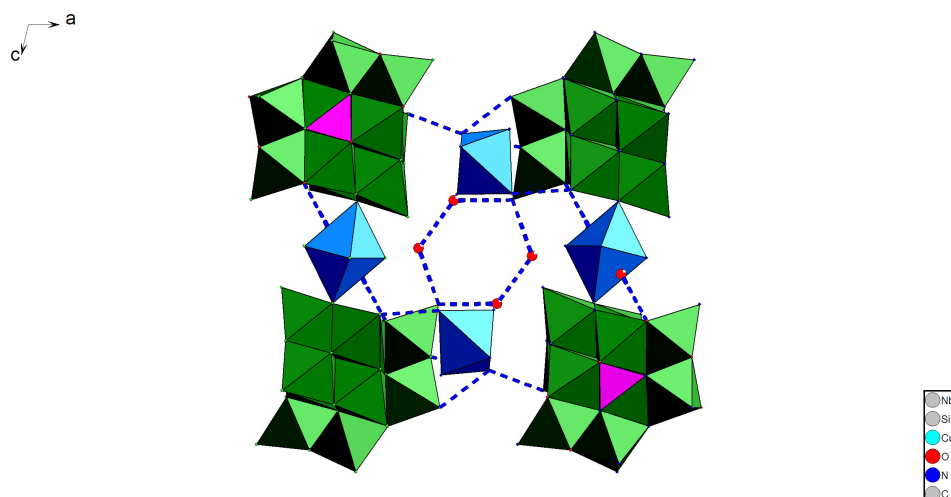

**Fig. S3.** The H-bond of the 3D supramolecular structure.

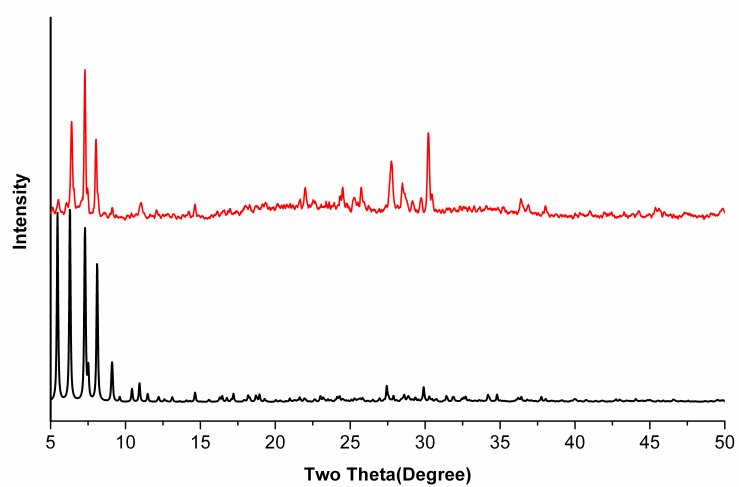

**Fig. S4.** The XRPD pattern (top) and simulated pattern (bottom) of **1**.

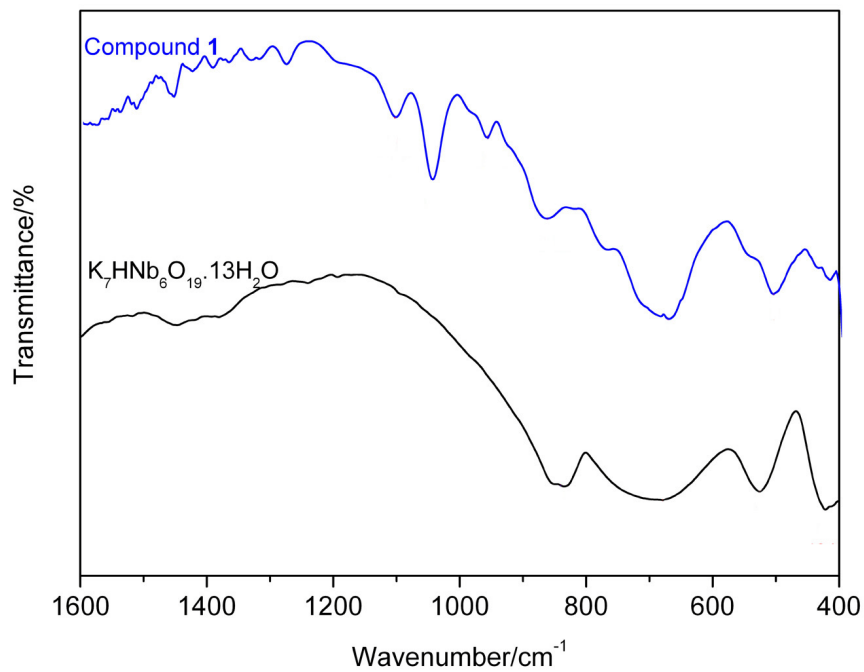

**Fig. S5.** The IR spectrum of **1**.

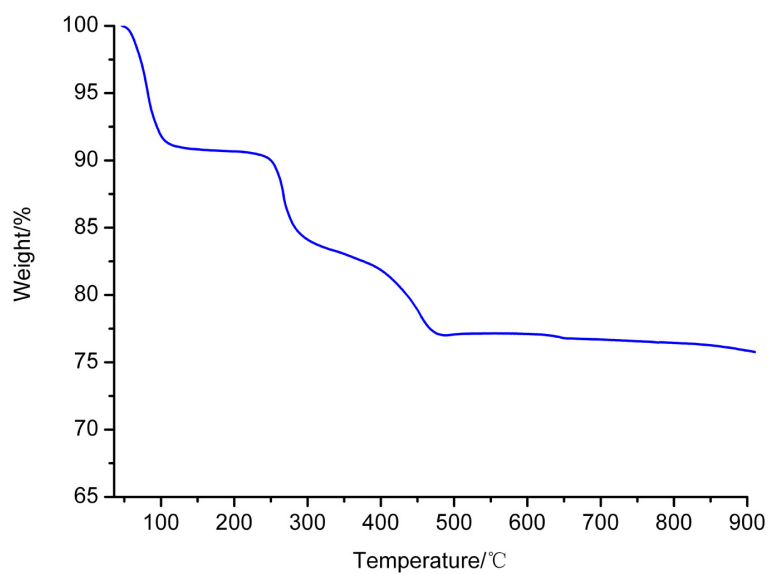

**Fig. S6.** The TG curve of **1**.

## References

- 1 M. Filowitz, R. K. C. Ho, W. G. Klemperer, W. Shum, *Inorg. Chem.*, 1979, **18**, 93.
